# Supplementary material
Source: PubMed Central journal article supplement (PMC4083114)
Supplement: supp_M113.033357_mcp.M113.033357-1.pdf [file supp_M113.033357_mcp.M113.033357-1.pdf]

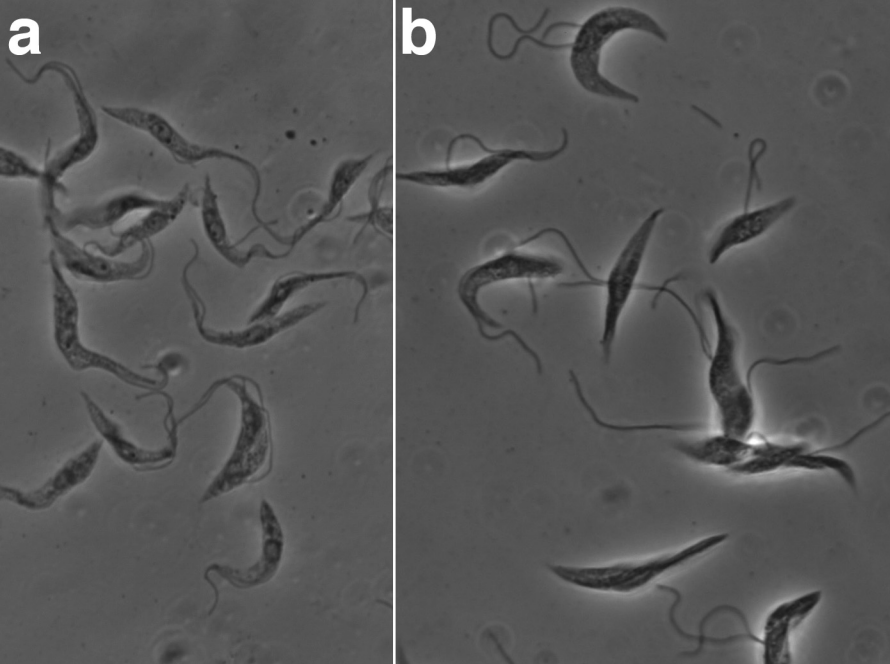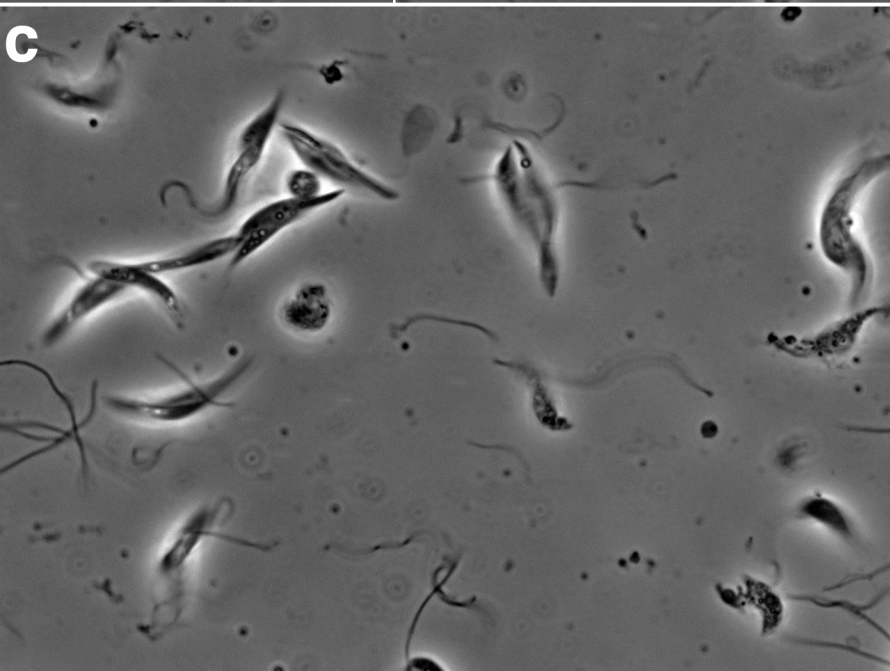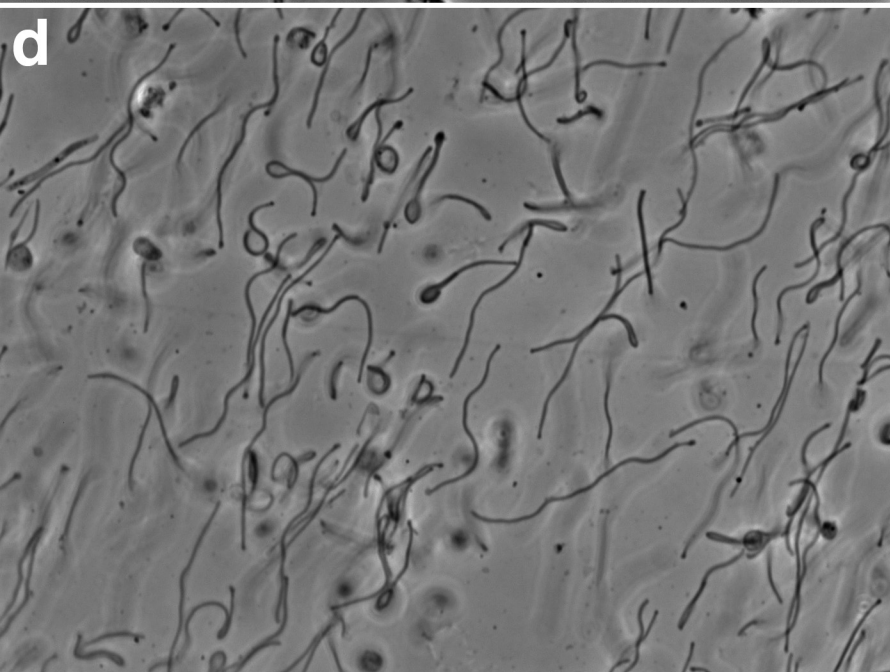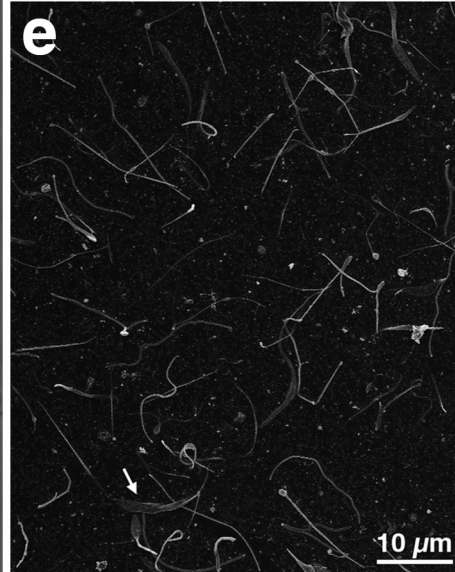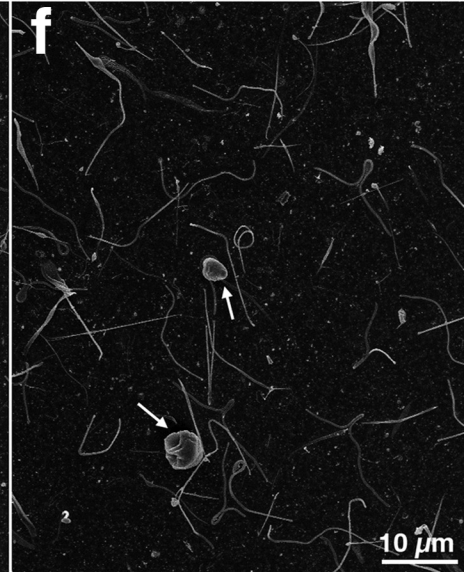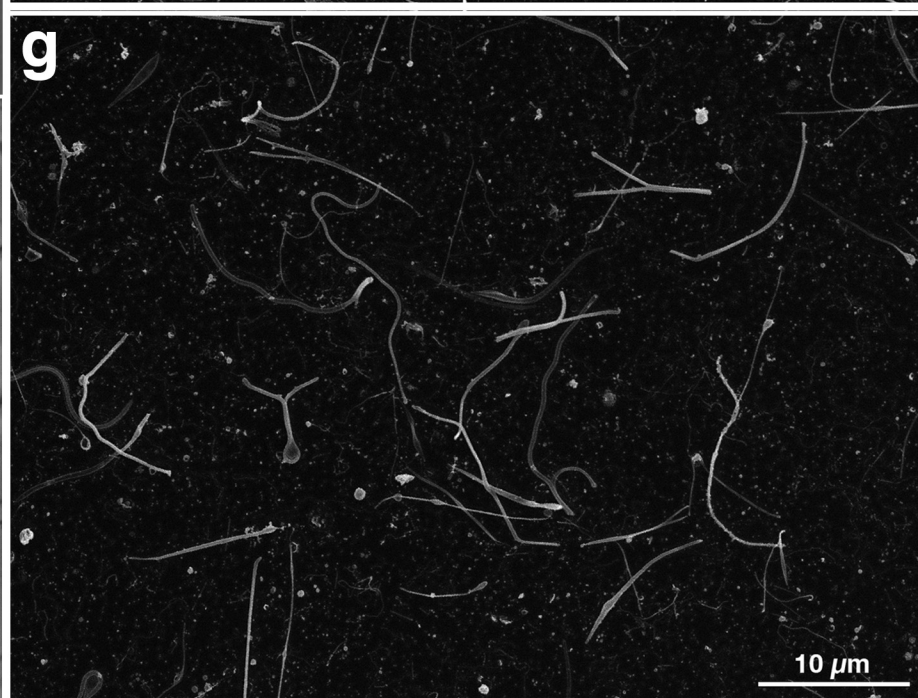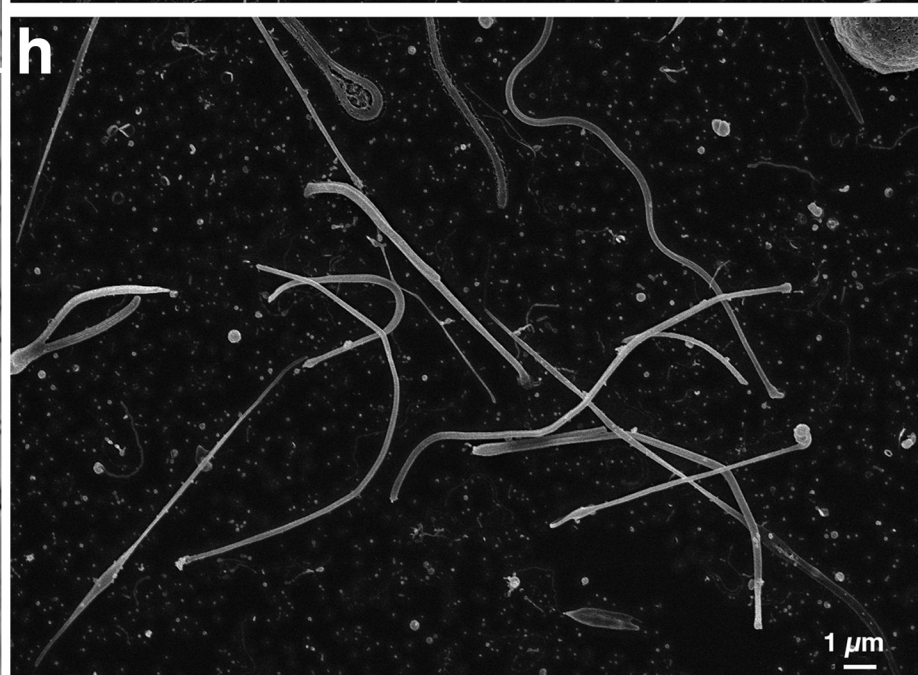

Figure S1

Phase/DAPI

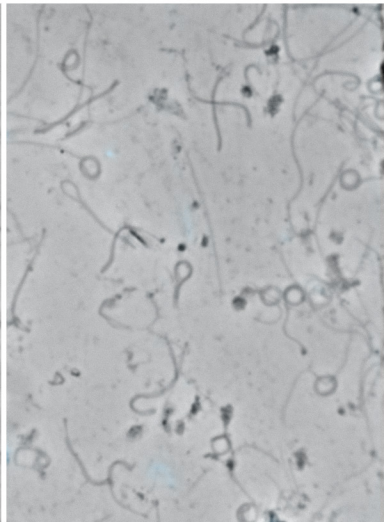

MAb25

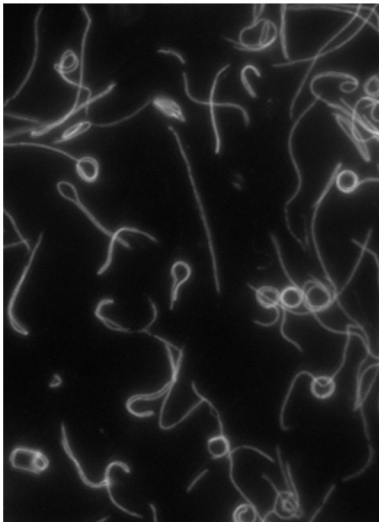

IFT172

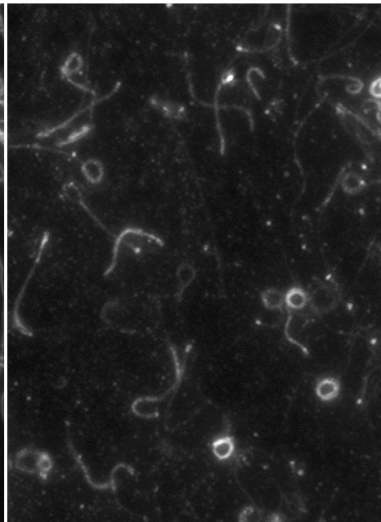

MAb25/IFT172

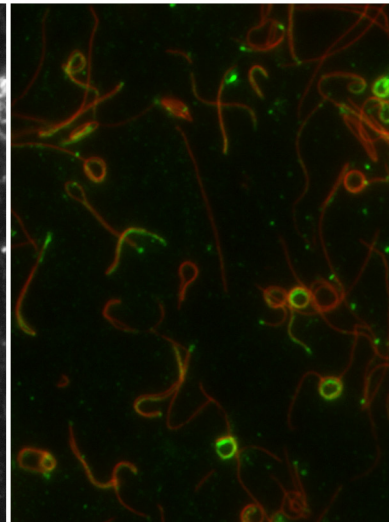

Figure S2

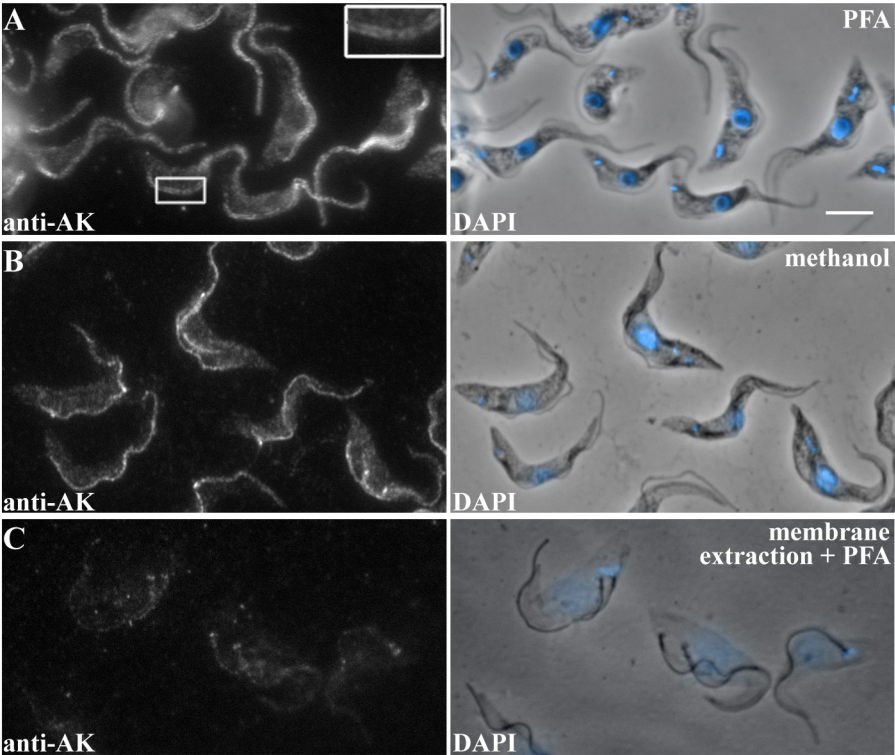

Figure S3

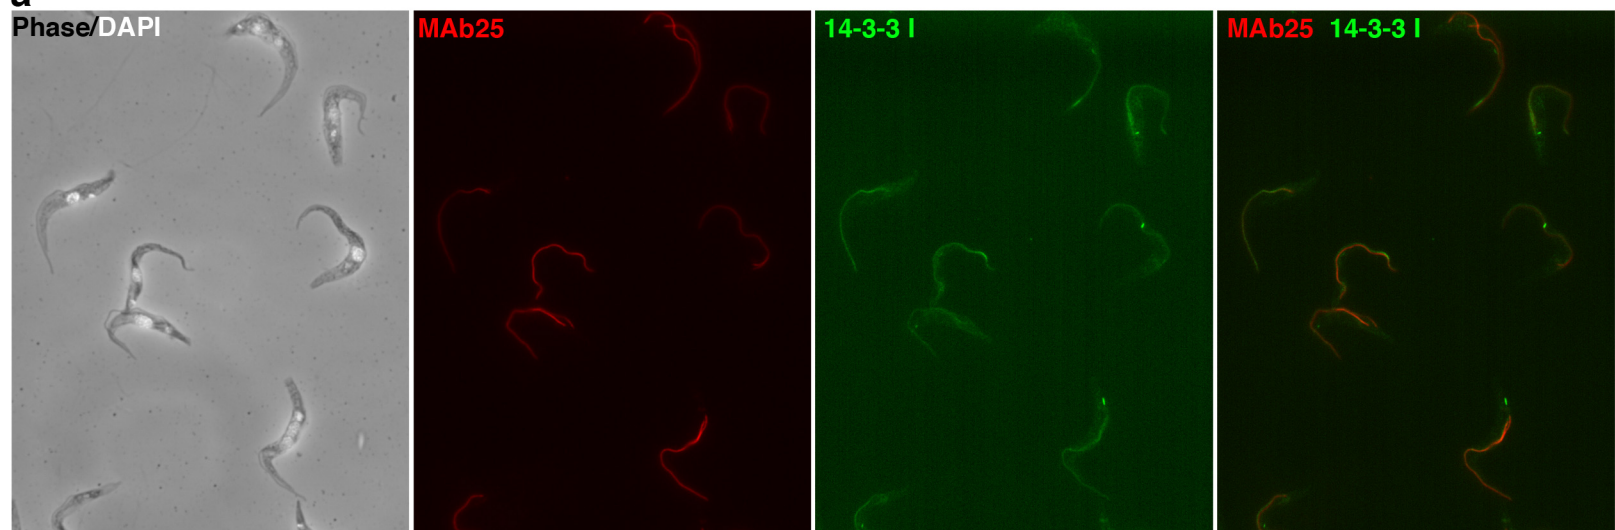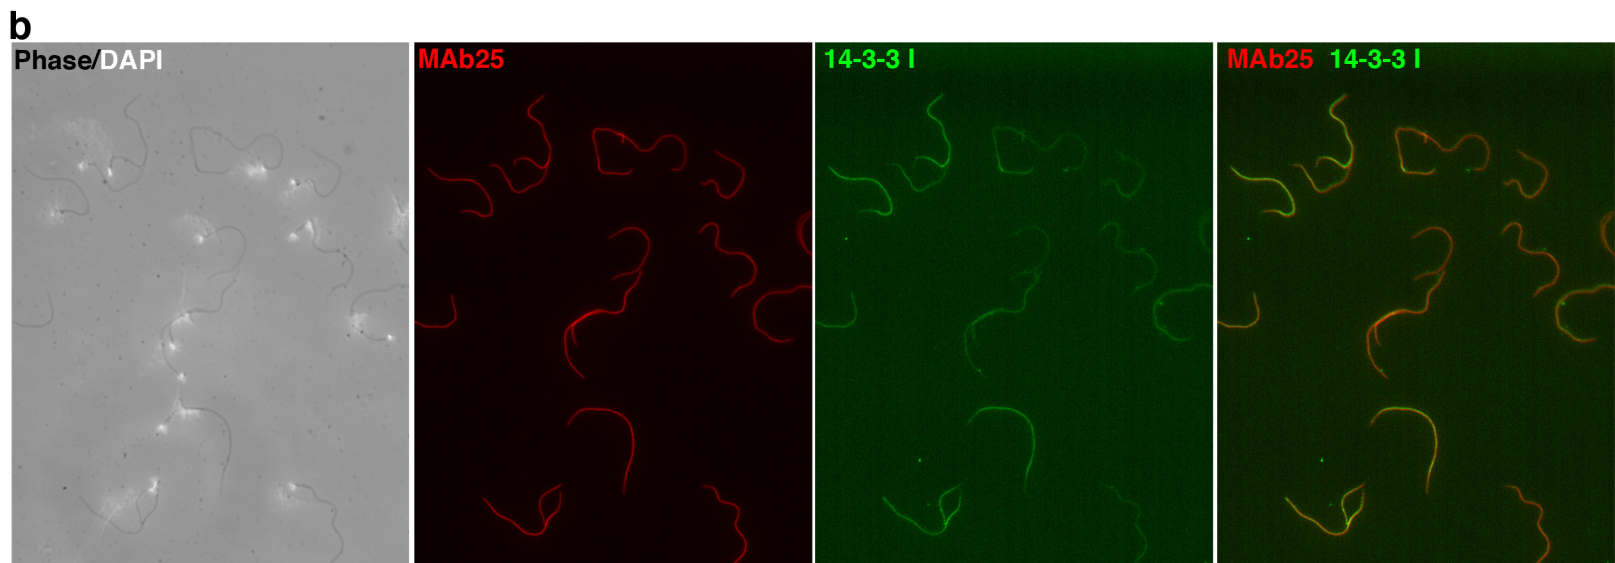

Figure S4

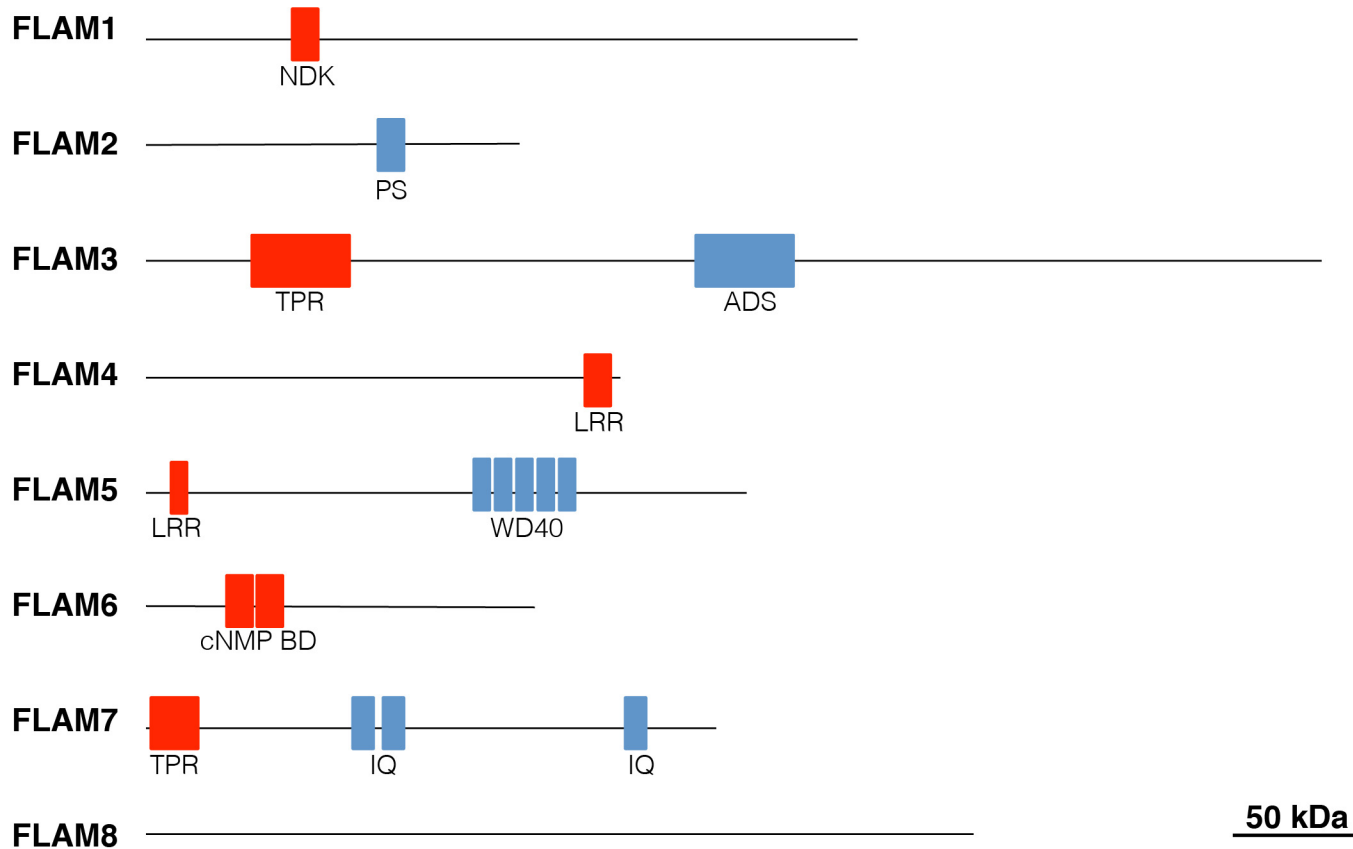

Figure S5

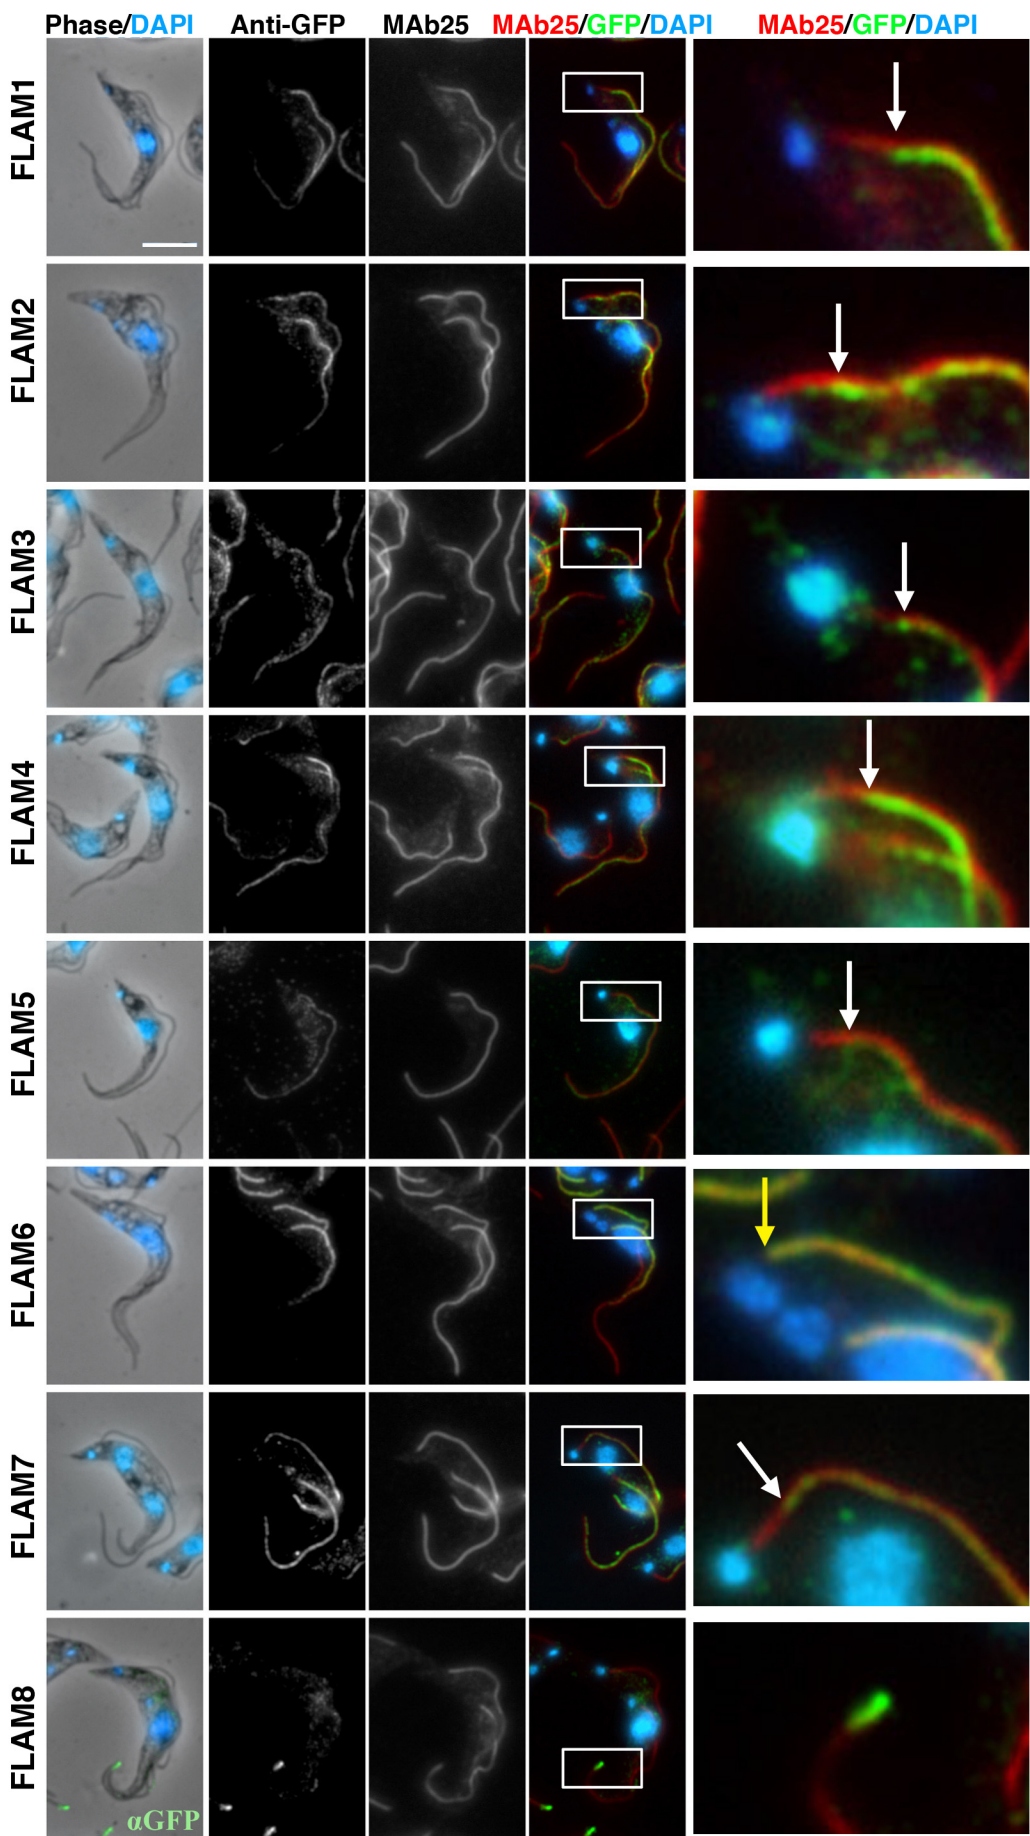

Figure S6

$\alpha$ GFP $\alpha$ GFP/DAPIphase/  
DAPI

FLAM1

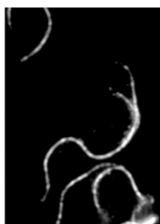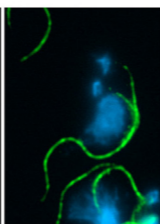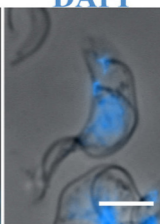

FLAM2

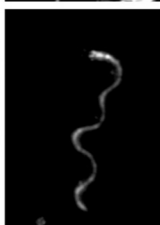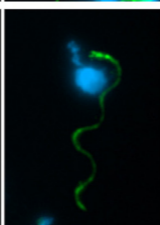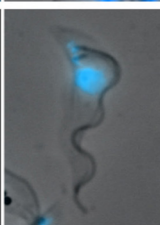

FLAM3

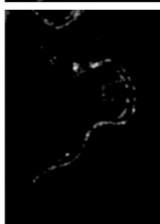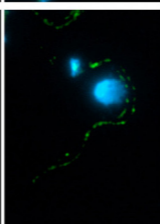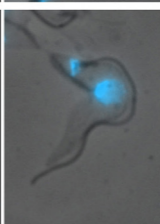

FLAM4

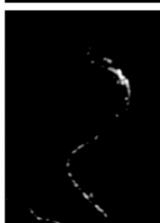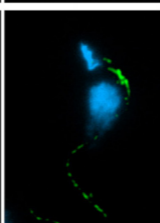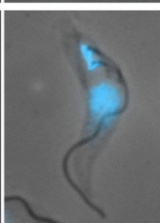

FLAM5

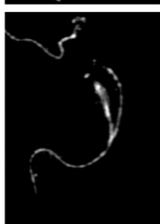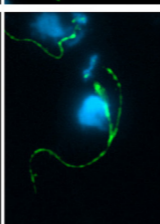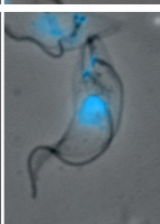

FLAM6

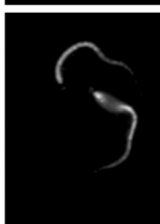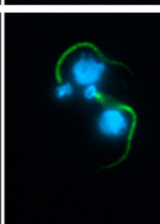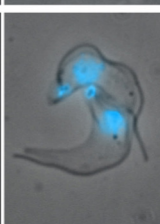

FLAM7

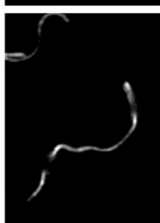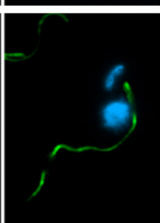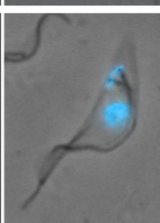

FLAM8

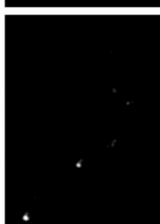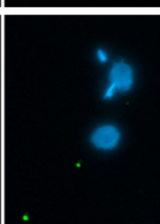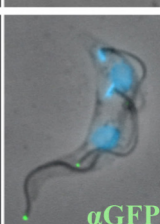

Figure S7
